# Supplementary material for: Consumer Perception of Banana Waste in Response to Ripeness: A Case Study of European and Chinese Panels
Source: Preprints.org preprint supplement (doi:10.20944/preprints202408.1911.v1), 2024-08-27
Supplement: Supplementary file 1 [file supplementary]

Consumer perception of banana waste in response to ripeness: a case study of European and Chinese panels

Malamatenia Panagiotou 1, Christina Ioannou 2, Lara Hachem 2, Qiya Huang 2, Ediriisa Mugampoza 3, Konstantinos Gkatzionis 1, 2, *

1 Laboratory of Consumer and Sensory Perception of Food & Drinks, Department of Food Science and Nutrition, University of the Aegean, Metropolite Ioakeim 2, Myrina, 81400, Lemnos, Greece

2 School of Chemical Engineering, University of Birmingham, Edgbaston, Birmingham, B15 2TT, United Kingdom

3 Department of Food Technology, Kyambogo University, P.O. Box 1, Kampala, Uganda

***** Correspondence: kgkatzionis@aegean.gr

**Supplementary material**

**Study 1: Process in full detail for reproducibility purposes.**

Five videos were filmed, using a CANON EOS 12000D camera (18 megapixels) with an EF-S 18-55 mm f/3.5-5.6 III lens (Canon Corporation, Japan), showing consumption of bananas of five degrees of ripeness (green, more green than yellow, all yellow, yellow with brown spots, and total black). The videos were recorded in a room with adequate lighting (between 755-1070 lux), neutral white background, and a table as the central surface. A white tablecloth, a transparent tray, and a model wearing a white t-shirt were used for all videos. Each video section began with three bananas on a tray. For each sample, the model peeled the banana and consumed it, without showing face.

One hundred and thirty-five adults (N=135) of European and Chinese origin participated in this study [European: 68 (31 male), Chinese: 66 (22 male)]. All participants were recruited from the University of Birmingham and surrounding areas. The testing procedure was carried out according to He *et al.* (2016) [1] and Kemp *et al.* (2009) [2]. Room temperature was near 22oC, the light was between 755-1070 lux (measured by the EasyViewTM 33 light meter) and each participant sat on a chair alone, without any equipment around except for the laptop, and no noise [2,3]. The moderator explained procedures and equipment to the participant and allowed ample time for questions. The participant sat on a comfortable chair in front of a computer monitor with a Logitech BRIO webcam at eye-level (1m distance), which was used to film participants’ facial expressions [1]. Participants were directed to sit facing the computer monitor while watching the video without touching their face. The moderator was absent while the video was playing. Each video lasted 15 seconds and, in between the videos of banana consumption, a photo (relaxing beach scenery) was shown for ten seconds to reduce transfer of emotions and minimize potential anticipatory effects [4] (Figure S1).

**Figure S1.** The video sequence of samples presentation for facial recognition of emotions using FaceReader.

**
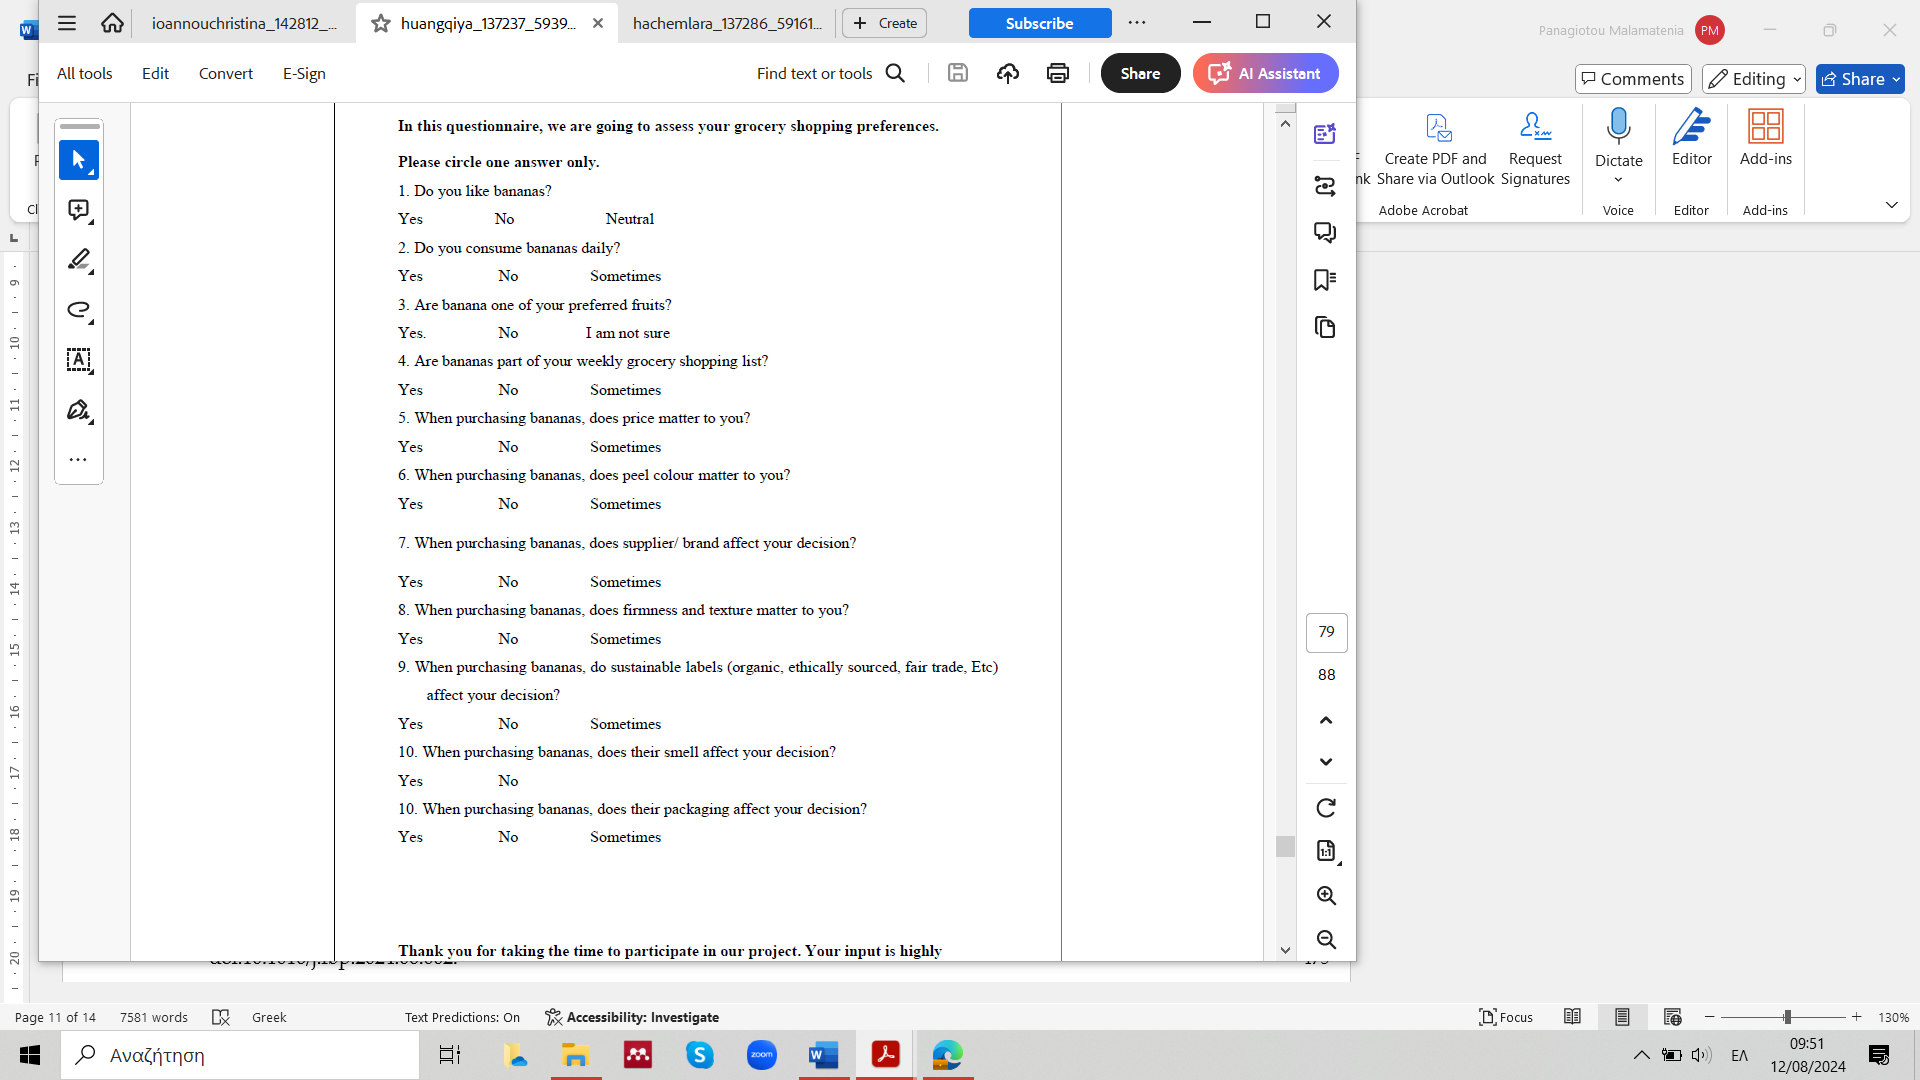
**

**Figure S2.** Grocery shopping questionnaire.

**Study 2: Process in full detail for reproducibility purposes.**

Banana samples in the boxes were photographed every day to capture all ripeness degrees. Banana images were captured using a digital camera (Nikon Corporation, Tokyo, Japan) mounted on an adjustable stand positioned 1.25m away from the model who was sitting in front of a whiteboard, in a position allowing minimum shadow and glare. Each banana sample was placed on a white tray and photographed in a dark box at room temperature. The pictures were saved in JPEG format and analyzed for banana ripening. ImageJ was used to identify red, green, and blue values for the white areas of bananas. Color intensity differences between rMean and gMean were measured with the color histogram tool in ImageJ software to represent the ripening degrees of banana. The riper the banana is, the intensity percentage of red of the whole banana image is higher. The less ripe the banana is, the intensity percentage of green of the whole banana image is higher. By measuring the intensity differences of red and green, banana ripening degrees could be determined. Before the experiment, the color scale of all degrees of ripening banana was made. The level of spoilage of the banana was evaluated by exploiting classic quality ripening degrees indicators (Figure S3, Table S1). The same five ripening degrees as in study 1 were used as stimuli: pictures of bananas were used for liking measurement (Figure 1), and pictures of a model consuming each sample were used for emotion measurement (Figure S4).

**Figure S3.** Quantification of color changes and development of brown spots in the same banana during ripening at 18oC and 90% relative humidity [5].

**Table S1.** Mean color intensities and standard deviation (pixels) (as measured by ImageJ software) in banana samples that were used in studies 1 and 2.

**Figure S4.** Pictures of model consuming bananas of various ripeness degrees provided as stimuli for emotion measurement using PrEmo®.

**Table S2.** FaceReader results for European and Chinese participants.

|  |  | **degree 1** | | | | **degree 2** | | | | **degree 3** | | |  | **degree 4** | | |  | **degree 5** | | |  |
| --- | --- | --- | --- | --- | --- | --- | --- | --- | --- | --- | --- | --- | --- | --- | --- | --- | --- | --- | --- | --- | --- |
|  |  | **1** | **2** | **3** | **average** | **1** | **2** | **3** | **average** | **1** | **2** | **3** | **average** | **1** | **2** | **3** | **average** | **1** | **2** | **3** | **average** |
| **European** | **neutral** | **0.719** | **0.698** | **0.673** | **0.697** | **0.743** | **0.745** | **0.728** | **0.739** | **0.711** | **0.721** | **0.701** | **0.711** | **0.732** | **0.705** | **0.674** | **0.704** | **0.723** | **0.657** | **0.65** | **0.677** |
|  | **happy** | **0.163** | **0.165** | **0.189** | **0.172** | **0.114** | **0.123** | **0.113** | **0.117** | **0.175** | **0.155** | **0.152** | **0.161** | **0.127** | **0.134** | **0.158** | **0.140** | **0.137** | **0.173** | **0.189** | **0.166** |
|  | **sad** | **0.094** | **0.093** | **0.099** | **0.095** | **0.108** | **0.096** | **0.101** | **0.102** | **0.101** | **0.093** | **0.091** | **0.095** | **0.121** | **0.115** | **0.112** | **0.116** | **0.114** | **0.126** | **0.114** | **0.118** |
|  | **angry** | **0.04** | **0.064** | **0.065** | **0.056** | **0.064** | **0.061** | **0.065** | **0.063** | **0.044** | **0.055** | **0.083** | **0.061** | **0.65** | **0.085** | **0.087** | **0.274** | **0.055** | **0.074** | **0.071** | **0.067** |
|  | **surprised** | **0.023** | **0.012** | **0.012** | **0.016** | **0.018** | **0.019** | **0.017** | **0.018** | **0.015** | **0.014** | **0.012** | **0.014** | **0.012** | **0.009** | **0.01** | **0.010** | **0.018** | **0.015** | **0.012** | **0.015** |
|  | **scared** | **0.013** | **0.013** | **0.011** | **0.012** | **0.015** | **0.015** | **0.013** | **0.014** | **0.011** | **0.011** | **0.011** | **0.011** | **0.012** | **0.012** | **0.015** | **0.013** | **0.014** | **0.013** | **0.013** | **0.013** |
|  | **disgusted** | **0.011** | **0.017** | **0.013** | **0.014** | **0.015** | **0.014** | **0.013** | **0.014** | **0.013** | **0.013** | **0.016** | **0.014** | **0.015** | **0.025** | **0.027** | **0.022** | **0.022** | **0.034** | **0.027** | **0.028** |
| **Chinese** | **neutral** | **0.548** | **0.553** | **0.56** | **0.554** | **0.537** | **0.577** | **0.608** | **0.574** | **0.549** | **0.55** | **0.545** | **0.548** | **0.535** | **0.523** | **0.516** | **0.525** | **0.549** | **0.547** | **0.568** | **0.555** |
|  | **happy** | **0.069** | **0.057** | **0.057** | **0.061** | **0.04** | **0.038** | **0.037** | **0.038** | **0.046** | **0.046** | **0.043** | **0.045** | **0.04** | **0.065** | **0.093** | **0.066** | **0.043** | **0.059** | **0.063** | **0.055** |
|  | **sad** | **0.256** | **0.235** | **0.239** | **0.243** | **0.284** | **0.234** | **0.202** | **0.240** | **0.267** | **0.261** | **0.231** | **0.253** | **0.321** | **0.28** | **0.261** | **0.287** | **0.308** | **0.271** | **0.233** | **0.271** |
|  | **angry** | **0.129** | **0.154** | **0.154** | **0.146** | **0.117** | **0.132** | **0.13** | **0.126** | **0.135** | **0.148** | **0.161** | **0.148** | **0.125** | **0.149** | **0.147** | **0.140** | **0.117** | **0.127** | **0.134** | **0.126** |
|  | **surprised** | **0.119** | **0.113** | **0.09** | **0.107** | **0.103** | **0.108** | **0.1** | **0.104** | **0.098** | **0.094** | **0.099** | **0.097** | **0.061** | **0.063** | **0.058** | **0.061** | **0.074** | **0.073** | **0.071** | **0.073** |
|  | **scared** | **0.049** | **0.049** | **0.046** | **0.048** | **0.056** | **0.051** | **0.06** | **0.056** | **0.044** | **0.04** | **0.044** | **0.043** | **0.042** | **0.044** | **0.049** | **0.045** | **0.051** | **0.052** | **0.058** | **0.054** |
|  | **disgusted** | **0.041** | **0.05** | **0.058** | **0.050** | **0.043** | **0.044** | **0.041** | **0.043** | **0.046** | **0.04** | **0.049** | **0.045** | **0.047** | **0.054** | **0.047** | **0.049** | **0.041** | **0.058** | **0.042** | **0.047** |

**Table S3.** PrEmo results for European and Chinese participants.

|  |  | degree 1 | degree 2 | degree 3 | degree 4 | degree 5 |
| --- | --- | --- | --- | --- | --- | --- |
| admiration | Europeans | 0.91 | 1.71 | 1.57 | 1.06 | 0.82 |
|  | Chinese | 0.83 | 1.26 | 1.73 | 0.85 | 0.93 |
| boredom | Europeans | 0.91 | 0.56 | 0.64 | 0.49 | 0.88 |
|  | Chinese | 0.66 | 0.23 | 0.17 | 0.39 | 0.55 |
| contempt | Europeans | 0.84 | 0.43 | 0.24 | 0.19 | 1.03 |
|  | Chinese | 0.48 | 0.1 | 0.08 | 0.37 | 0.46 |
| desire | Europeans | 0.76 | 1.95 | 2.24 | 1.57 | 0.58 |
|  | Chinese | 0.37 | 0.37 | 2.45 | 0.56 | 0.21 |
| disgust | Europeans | 1.68 | 0.35 | 0.12 | 0.12 | 2.49 |
|  | Chinese | 1.41 | 0.32 | 0.01 | 1.44 | 2.54 |
| dissatisfaction | Europeans | 1.48 | 0.49 | 0.18 | 0.15 | 1.75 |
|  | Chinese | 1.59 | 0.51 | 0.15 | 1.69 | 2.07 |
| fascination | Europeans | 1.12 | 2.05 | 1.71 | 1.17 | 0.81 |
|  | Chinese | 1.3 | 1.77 | 1.8 | 1.34 | 1.1 |
| fear | Europeans | 1.52 | 0.47 | 0.11 | 0.09 | 2.21 |
|  | Chinese | 1.7 | 0.39 | 0.03 | 1.51 | 2.46 |
| hope | Europeans | 0.54 | 1.64 | 1.59 | 1.29 | 0.46 |
|  | Chinese | 0.59 | 0.59 | 1.62 | 0.61 | 0.68 |
| joy | Europeans | 0.82 | 1.97 | 2.31 | 1.79 | 0.66 |
|  | Chinese | 0.7 | 0.7 | 2.45 | 0.79 | 0.46 |
| pride | Europeans | 0.81 | 1.74 | 2.09 | 1.65 | 0.64 |
|  | Chinese | 0.28 | 0.28 | 2.03 | 0.51 | 0.23 |
| sadness | Europeans | 0.67 | 0.19 | 0.16 | 0.15 | 0.95 |
|  | Chinese | 0.26 | 0.01 | 0.01 | 0.21 | 0.59 |
| satisfaction | Europeans | 0.92 | 2.63 | 2.77 | 2.58 | 0.72 |
|  | Chinese | 0.39 | 0.39 | 2.83 | 0.85 | 2.04 |
| shame | Europeans | 0.59 | 0.36 | 0.2 | 0.54 | 0.89 |
|  | Chinese | 0.28 | 0.11 | 0.06 | 0.32 | 0.61 |

References:

1. He, W.; Boesveldt, S.; de Graaf, C.; de Wijk, R.A. The Relation between Continuous and Discrete Emotional Responses to Food Odors with Facial Expressions and Non-Verbal Reports. *Food Qual. Prefer.* **2016**, *48*, 130–137, doi:10.1016/j.foodqual.2015.09.003.

2. Kemp, S.E.; Hollowood, T.; Hort, J. *Sensory Evaluation: A Practical Handbook*; 2013; ISBN 9781118688076.

3. Danner, L.; Haindl, S.; Joechl, M.; Duerrschmid, K. Facial Expressions and Autonomous Nervous System Responses Elicited by Tasting Different Juices. *Food Res. Int.* **2014**, *64*, 81–90, doi:10.1016/j.foodres.2014.06.003.

4. Walsh, A.M.; Duncan, S.E.; Bell, M.A.; O’Keefe, S.F.; Gallagher, D.L. Integrating Implicit and Explicit Emotional Assessment of Food Quality and Safety Concerns. *Food Qual. Prefer.* **2017**, *56*, 212–224, doi:10.1016/j.foodqual.2016.11.002.

5. Mendoza, F.; Aguilera, J.M. Application of Image Analysis for Classification of Ripening Bananas. *J. Food Sci.* **2004**, *69*, doi:10.1111/j.1365-2621.2004.tb09932.x.
